# Supplementary material for: The Combination of BH3-Mimetic ABT-737 with the Alkylating Agent Temozolomide Induces Strong Synergistic Killing of Melanoma Cells Independent of p53
Source: PubMed Central journal article supplement (PMC3163662; doi:10.1371/journal.pone.0024294), 2011-08-29
Supplement: pone.0024294.s001.pdf [file pone.0024294.s001.pdf]

**Supporting Information Table 1.** IC<sub>50</sub> values (μM) for two melanoma cell lines for two drugs with 72 h treatment times. Values in parentheses represent the 95% confidence interval.

|               | <b>ABT-737</b>   | <b>TMZ</b>     |
|---------------|------------------|----------------|
| <b>A375</b>   | 16.1 (6.09-42.5) | 401 (216-746)  |
| <b>1205Lu</b> | 27.1 (6.58-58.1) | 626 (351-1484) |
