# Supplementary material for: The Combination of BH3-Mimetic ABT-737 with the Alkylating Agent Temozolomide Induces Strong Synergistic Killing of Melanoma Cells Independent of p53
Source: PubMed Central journal article supplement (PMC3163662; doi:10.1371/journal.pone.0024294), 2011-08-29
Supplement: pone.0024294.s002.pdf [file pone.0024294.s002.pdf]

# Supporting Information Figure 1

## A

### $^{125}\text{Lu}$ , TMZ only

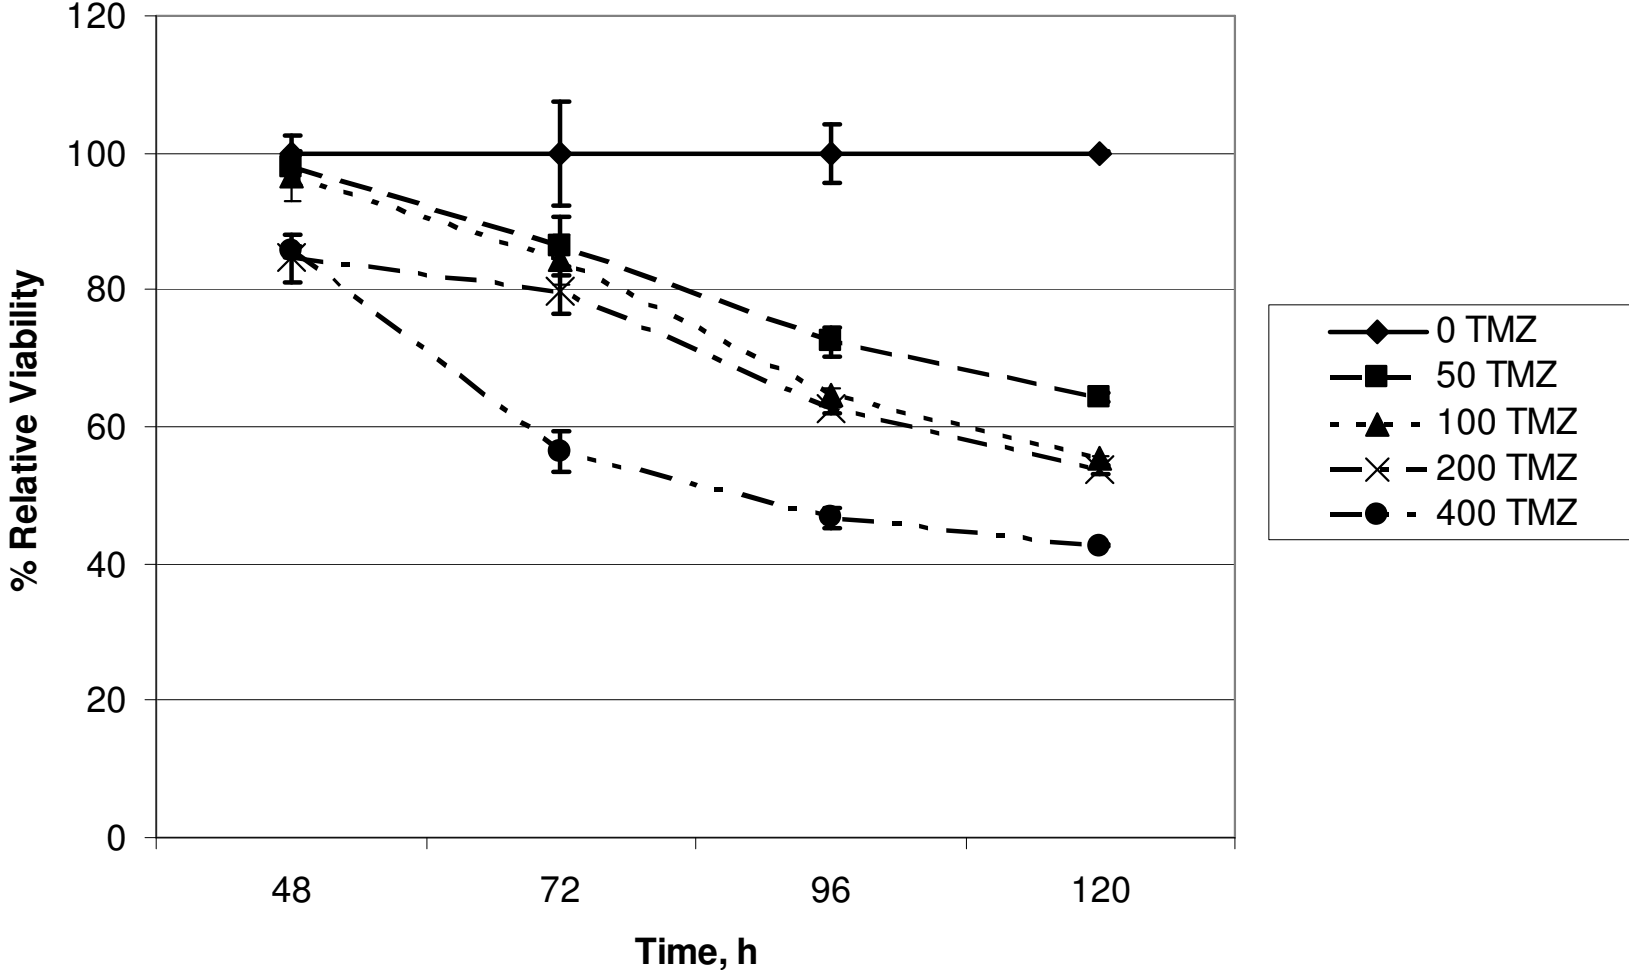

**B** **$^{125}\text{Lu}$ , TMZ + 3.3  $\mu\text{M}$  ABT-737**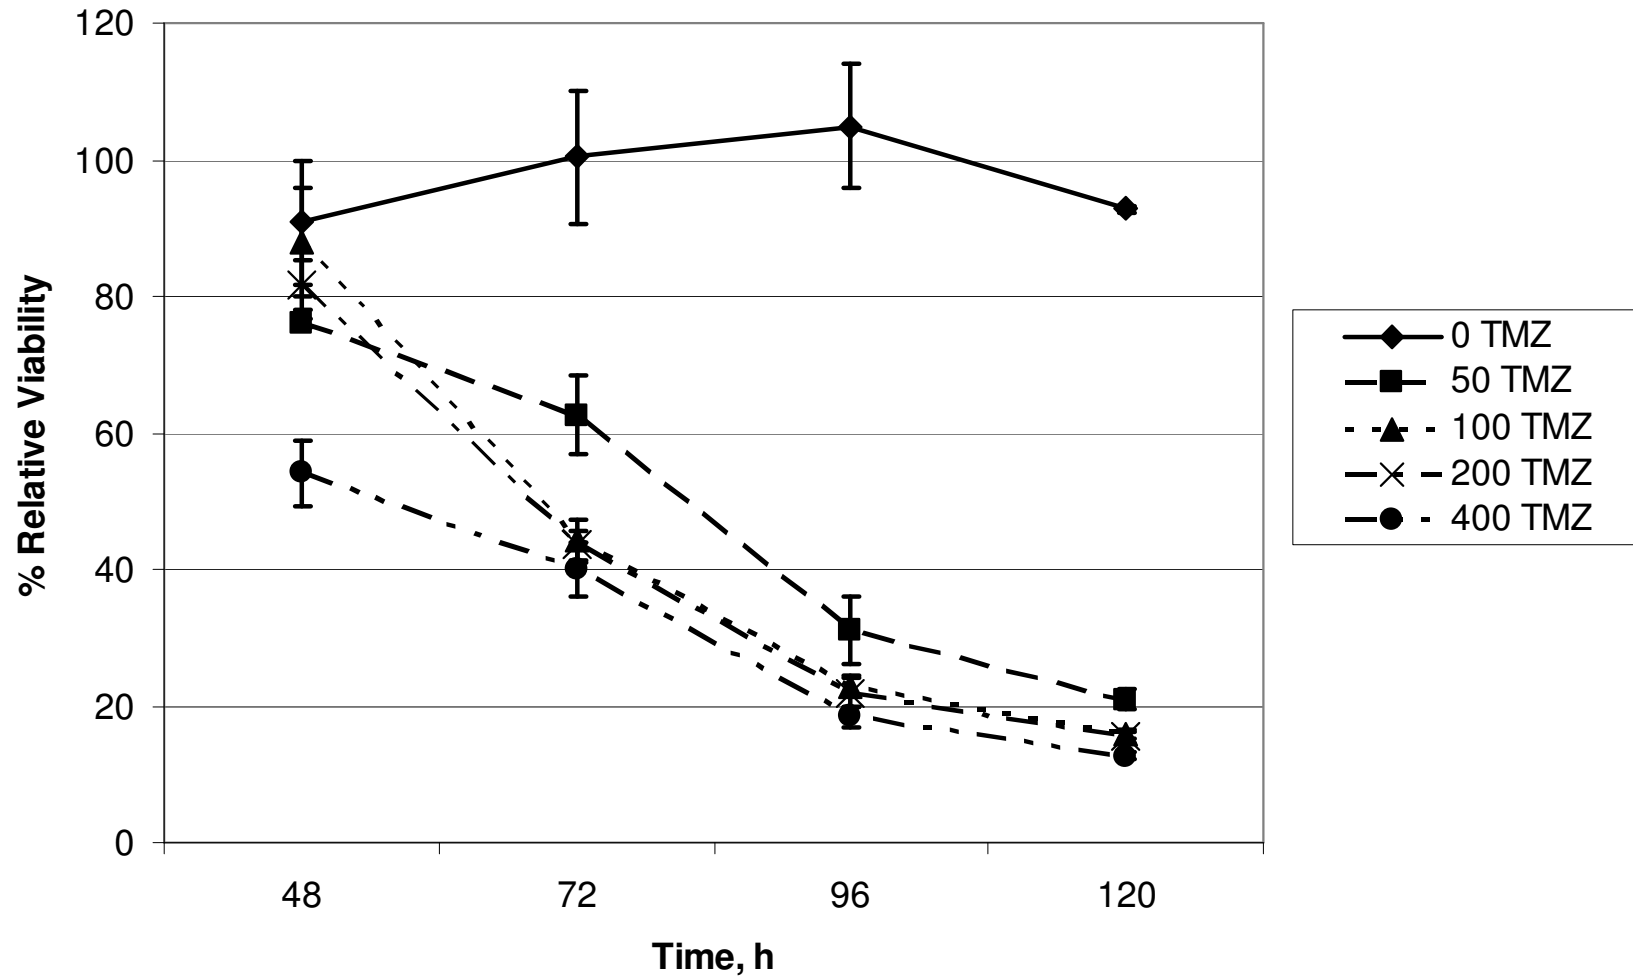

**C**

**A375, TMZ only**

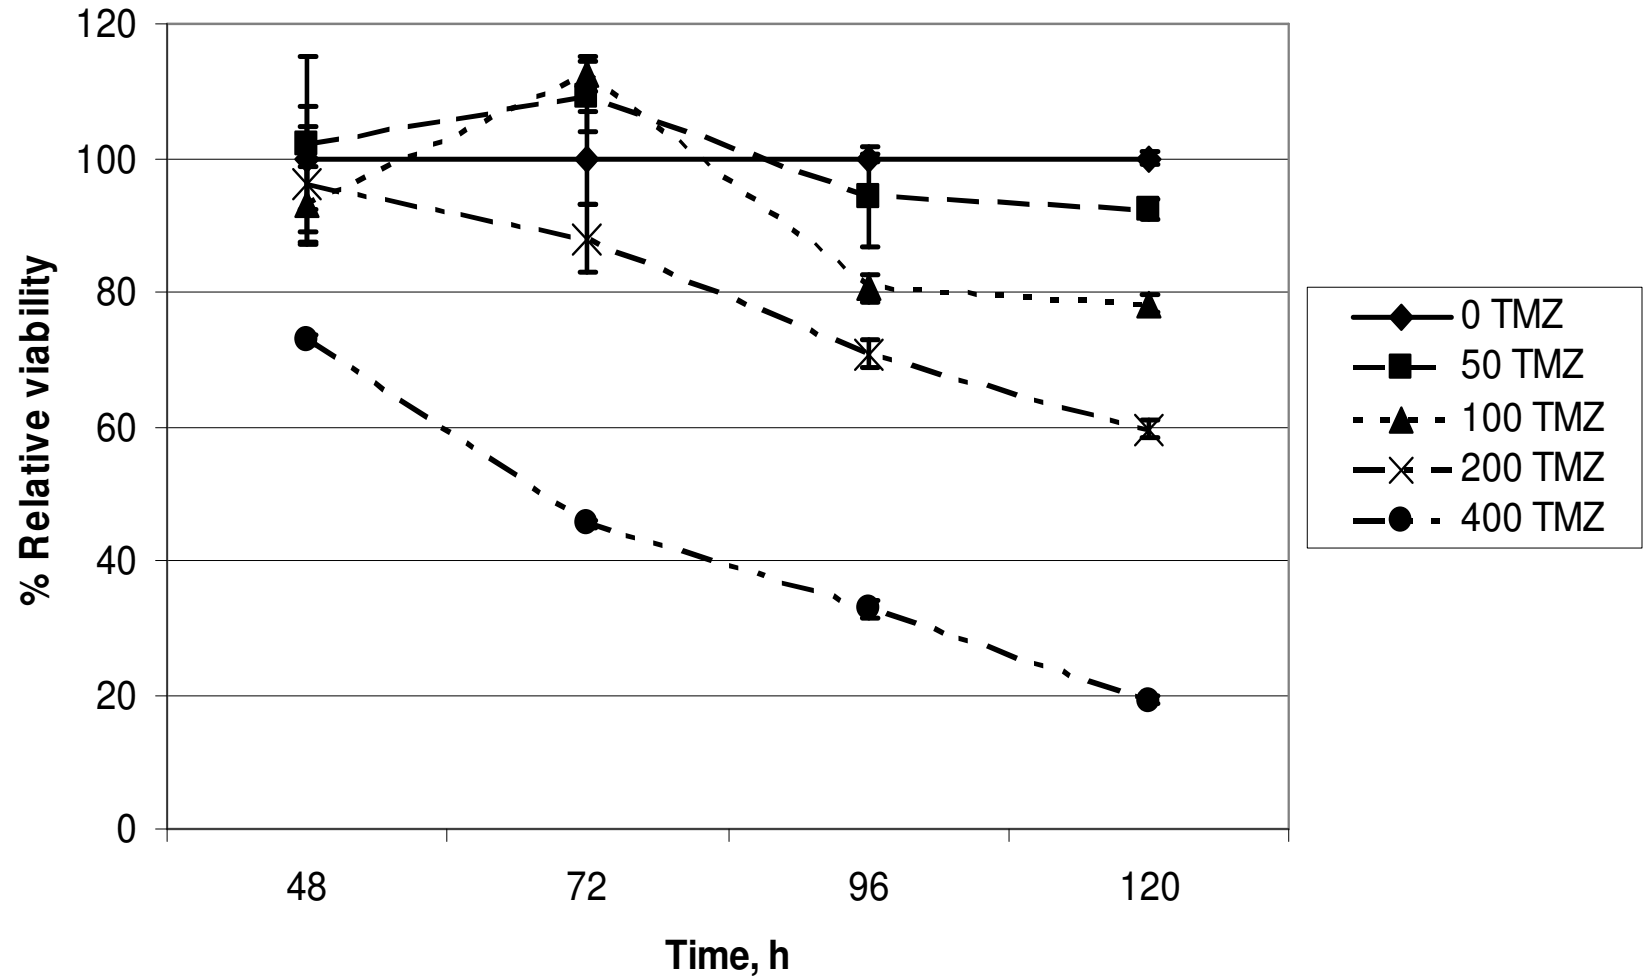

**D**

**A375, TMZ + 3.3  $\mu$ M ABT-737**

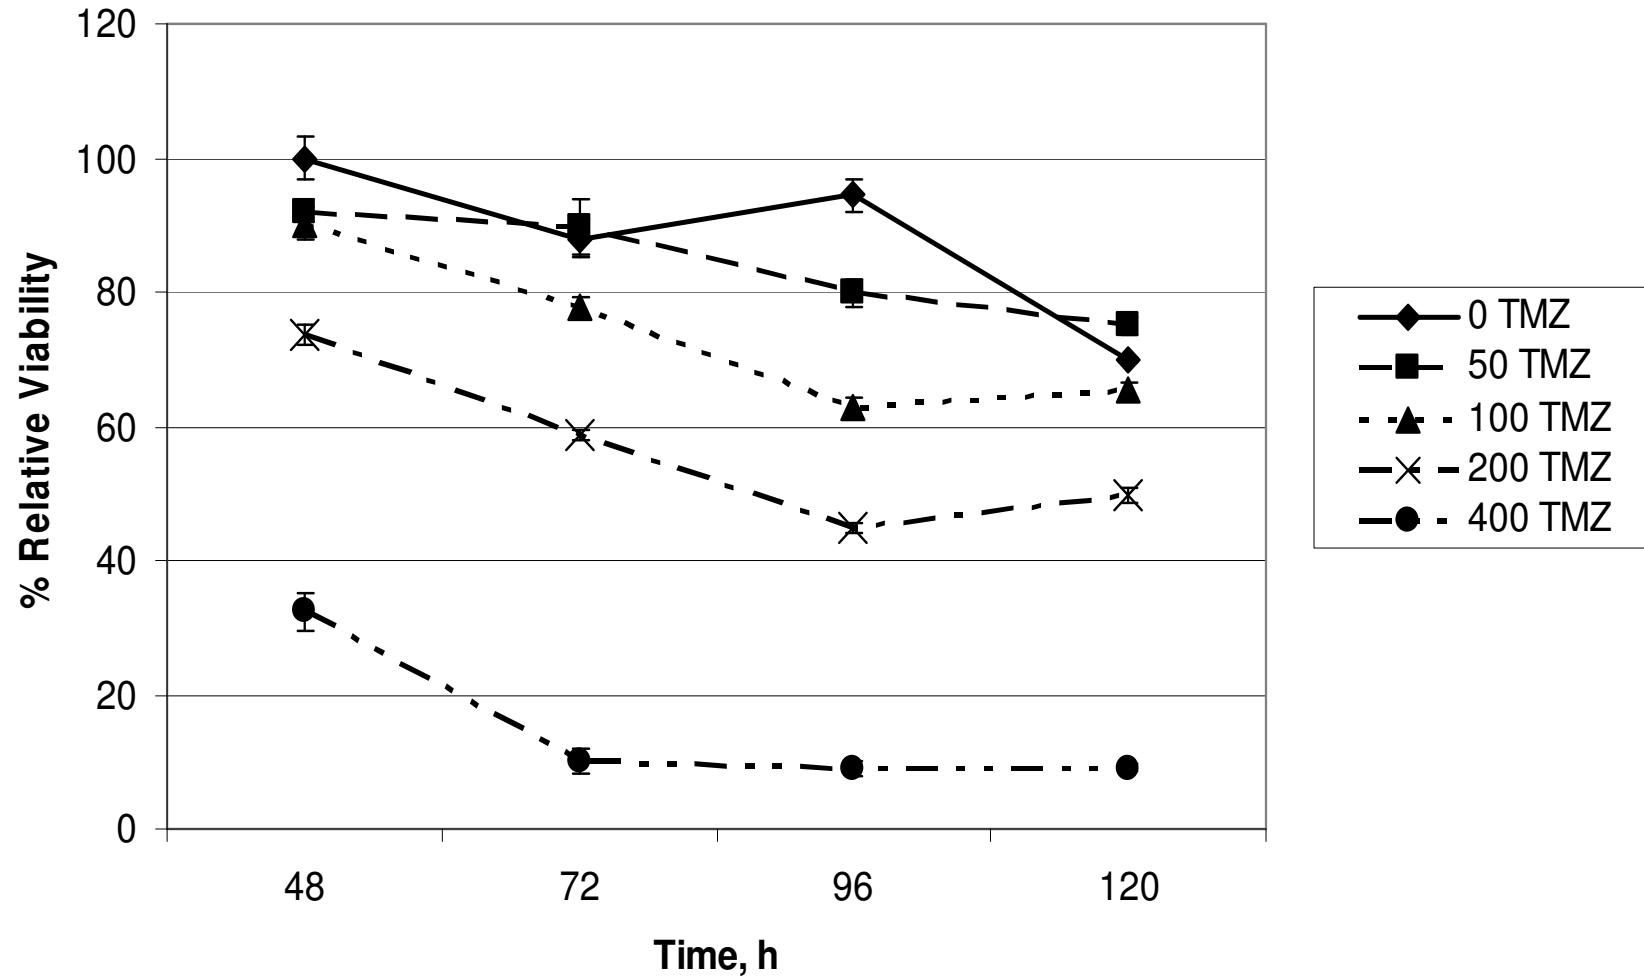

**Supporting Information Figure 1. Time-course experiments for cells treated with TMZ with or without ABT-737.** MTS assays were performed for each 24 h time-point between 48 and 120 h for 1205Lu (**A, B**) and A375 (**C, D**) cell lines. Experiments included varying concentrations ( $\mu\text{M}$ ) of TMZ alone (**A, C**) or varying concentrations of TMZ with 3.3  $\mu\text{M}$  of ABT-737 (**B, D**). Results for each cell line are normalized to DMSO controls (0 TMZ) set at 100% for each time-point, and error bars represent  $\pm$  SE of 3 measurements.
