# Supplementary material for: The Combination of BH3-Mimetic ABT-737 with the Alkylating Agent Temozolomide Induces Strong Synergistic Killing of Melanoma Cells Independent of p53
Source: PubMed Central journal article supplement (PMC3163662; doi:10.1371/journal.pone.0024294), 2011-08-29
Supplement: pone.0024294.s003.pdf [file pone.0024294.s003.pdf]

**A**

**$^{1205}\text{Lu}$**

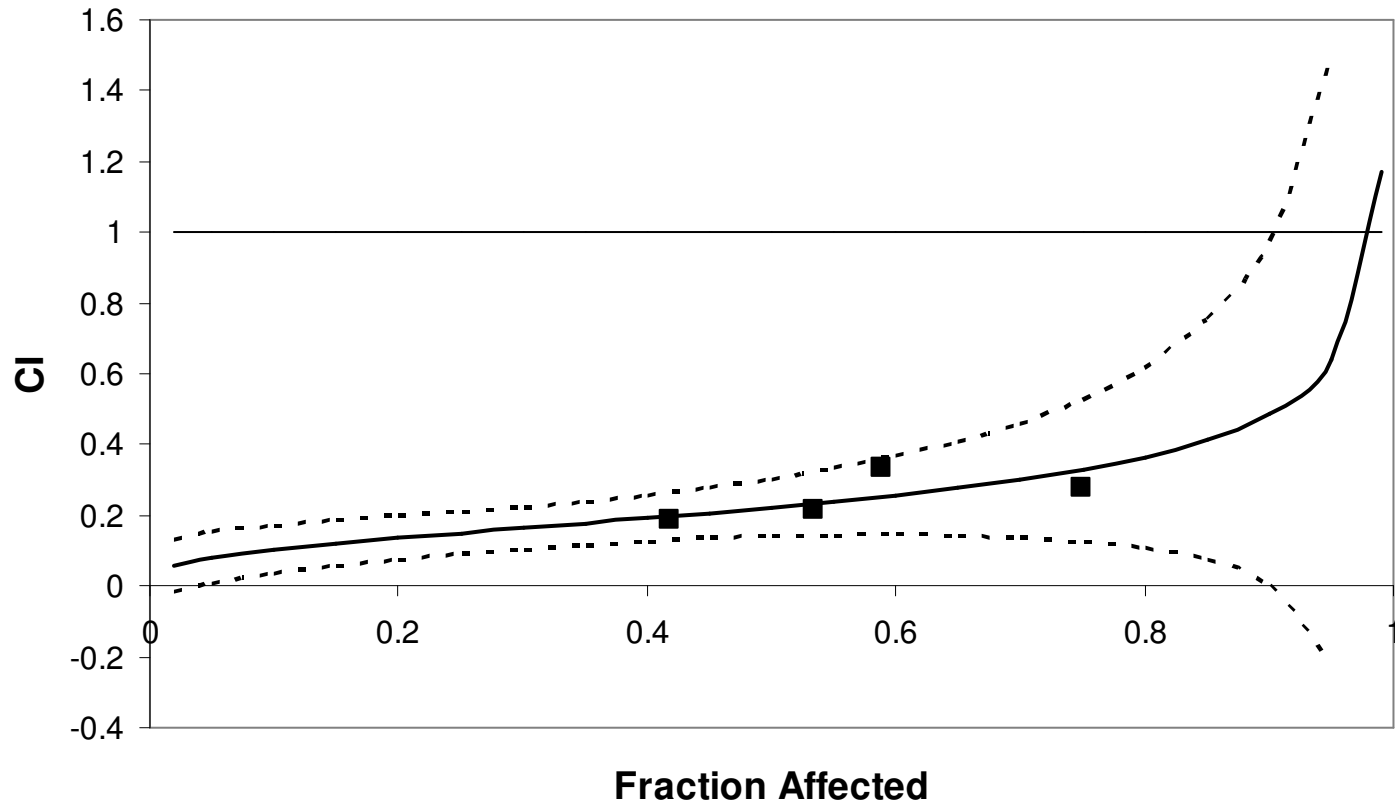

**B**

**A375**

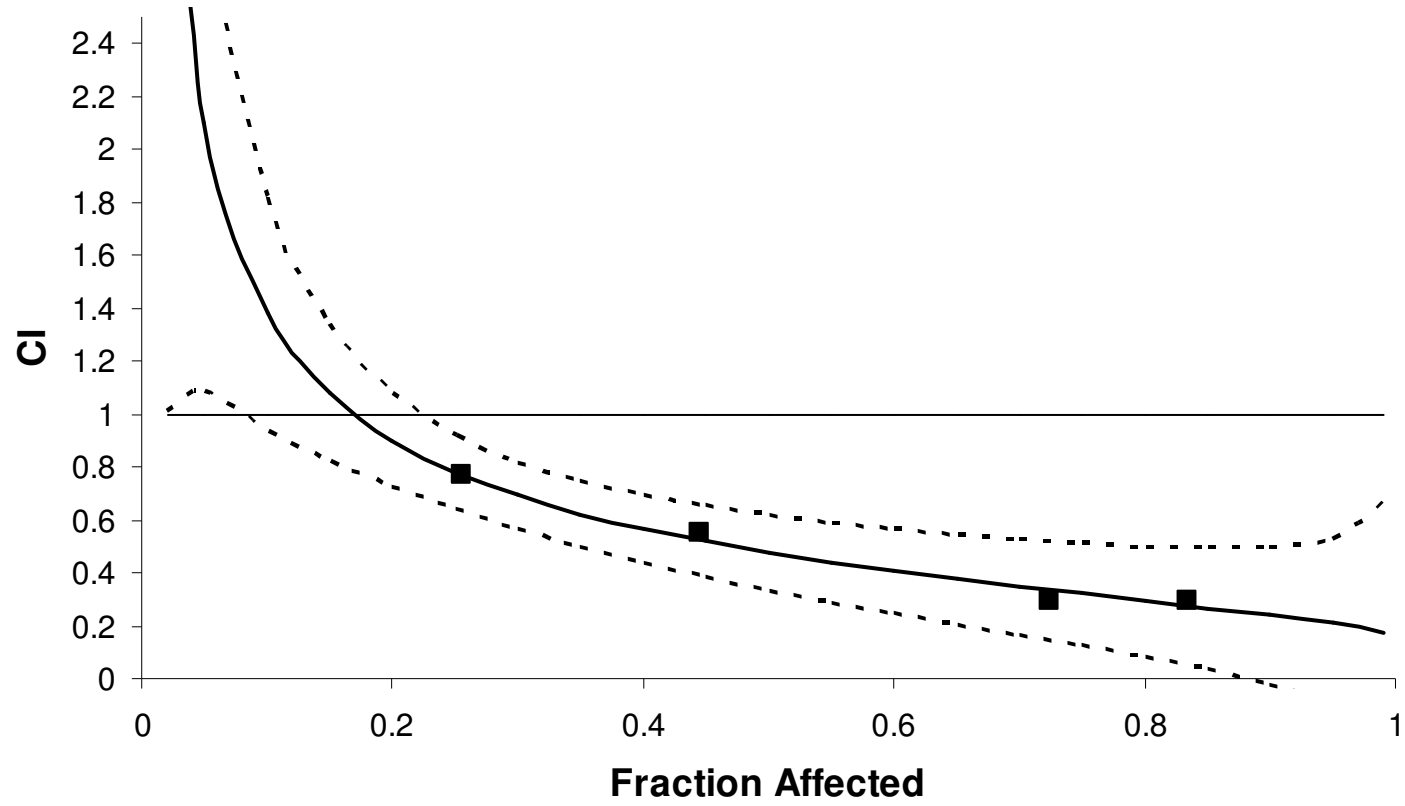

**Supporting Information Figure 2. Fraction affected vs. Combination Index (CI) for melanoma cells treated with TMZ and ABT-737.** 1205Lu cells (**A**) or A375 cells (**B**) were treated with escalating doses of TMZ (50, 100, 200, 400  $\mu$ M) and ABT-737 (0.94, 1.88, 3.75, 7.5  $\mu$ M) for 72 h and then subjected to MTS assays. CI plots were generated using Calcosyn software according to the Chou-Talalay method, and algebraic simulations are shown +/- estimated s.d.
